# Supplementary material for: Ferroelectricity and multiferroicity in two-dimensional Sc2P2Se6 and ScCrP2Se6 monolayers
Source: Royal Society of Chemistry journal article supplement (doi:10.1039/c9cp06966f), 2020-01-01
Supplement: c9cp06966f1.pdf [file c9cp06966f1.pdf]

# Supporting Information

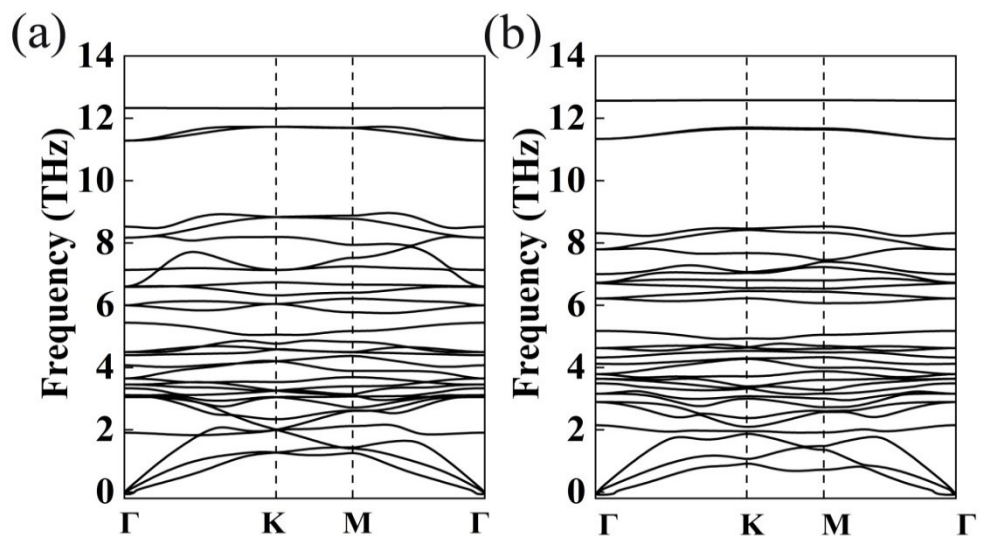

**Fig. S1** Phonon spectra of the (a)  $\text{Sc}_2\text{P}_2\text{Se}_6$  and (b)  $\text{ScCrP}_2\text{Se}_6$  monolayer

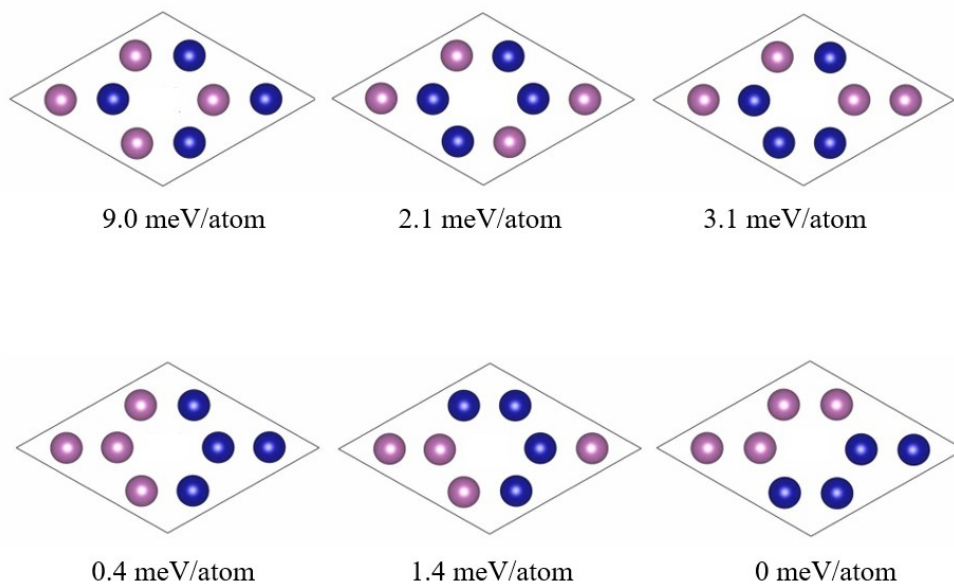

**Fig. S2** Different patterns of ScCrP<sub>2</sub>Se<sub>6</sub> monolayers. The number indicates the relative formation energy.

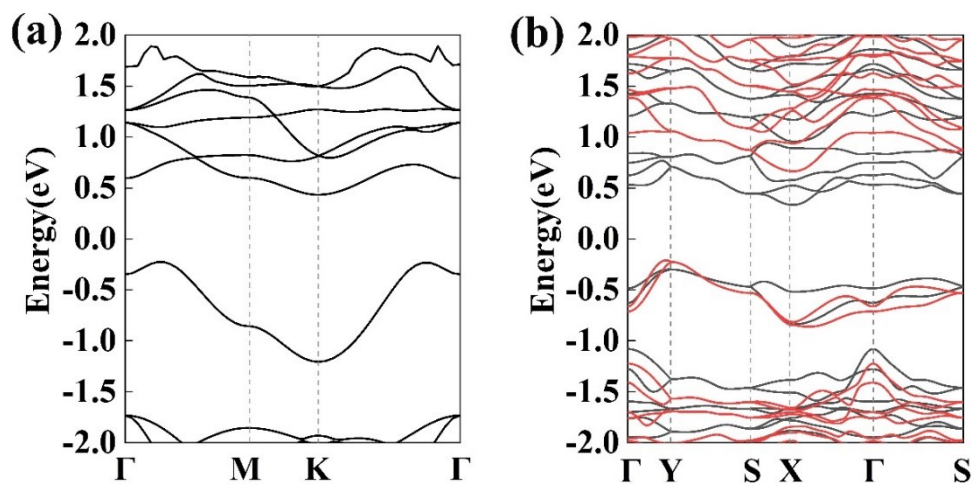

**Fig. S3** Band structures of  $\text{Sc}_2\text{P}_2\text{Se}_6$  (a) FE and  $\text{ScCrP}_2\text{Se}_6$  (b) AFE phase

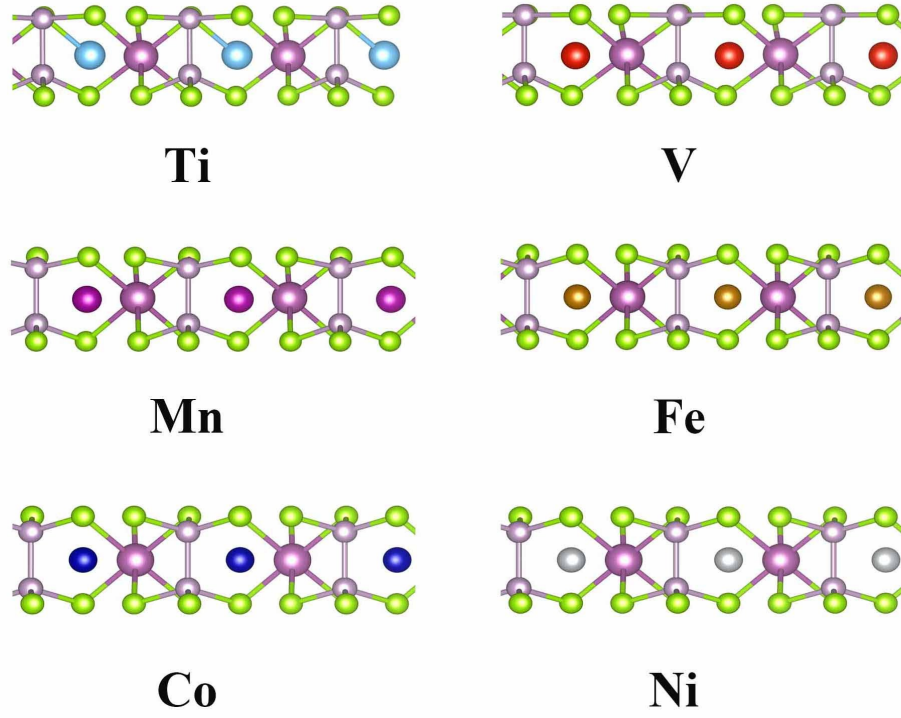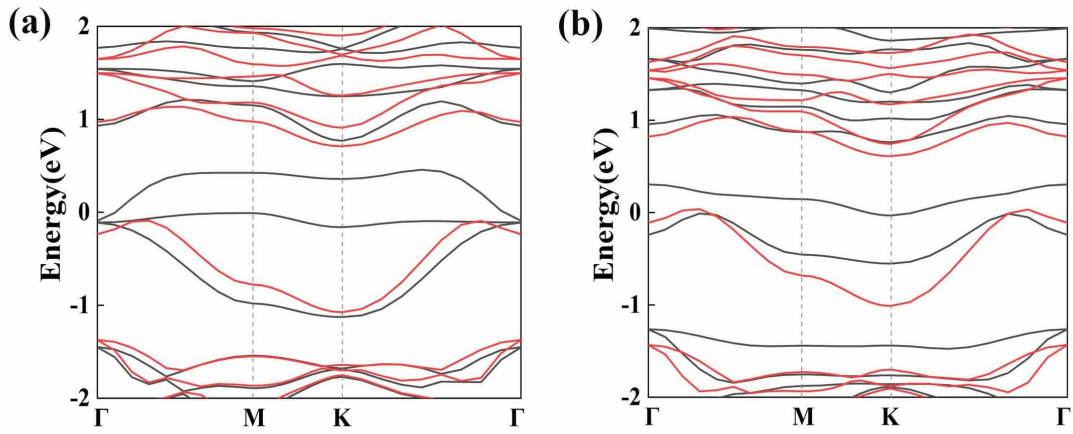

**Fig. S4** Optimized structures of the  $\text{ScXP}_2\text{Se}_6$  monolayer with  $X = \text{Ti}, \text{V}, \text{Mn}, \text{Fe}, \text{Co}$  and  $\text{Ni}$ . The band structures of  $\text{ScTiP}_2\text{Se}_6$  and  $\text{ScVP}_2\text{Se}_6$ . Ferromagnetic ordering was found to be energetically most favorable.

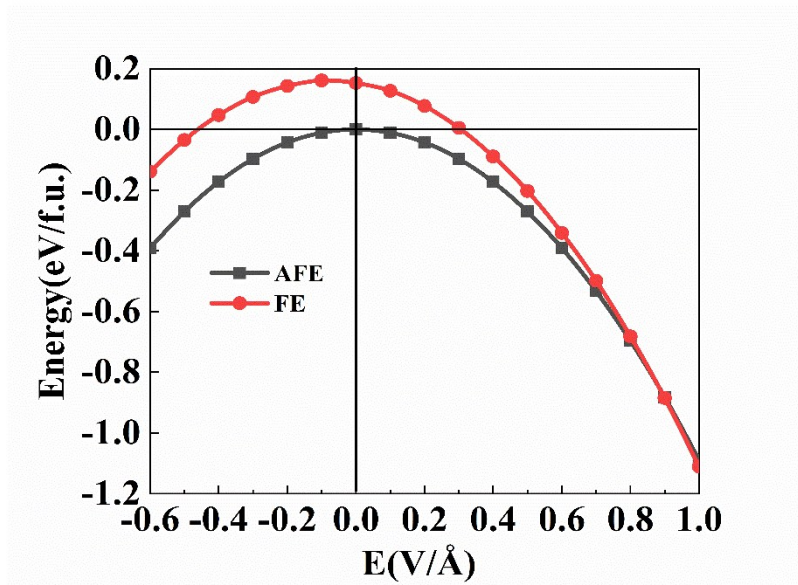

**Fig. S5** Energy variation of  $\text{ScCrP}_2\text{Se}_6$  monolayer under external electric field. The energy of AFE phase is set to be zero. Both curves represent FM state.

Sc2P2Se6 FE phase (space group: P31m)

1.0

|               |              |               |
|---------------|--------------|---------------|
| 6.6838002205  | 0.0000000000 | 0.0000000000  |
| -3.3419001102 | 5.7883407848 | 0.0000000000  |
| 0.0000000000  | 0.0000000000 | 23.2509994507 |

|    |   |    |
|----|---|----|
| Sc | P | Se |
| 2  | 2 | 6  |

Direct

|             |             |             |
|-------------|-------------|-------------|
| 0.333333343 | 0.666666687 | 0.601080000 |
| 0.666666687 | 0.333333343 | 0.601080000 |
| 0.000000000 | 0.000000000 | 0.568709970 |
| 0.000000000 | 0.000000000 | 0.667680025 |
| 0.688449979 | 0.688449979 | 0.530079961 |
| 0.311550021 | 0.000000000 | 0.530079961 |
| 0.000000000 | 0.311550021 | 0.530079961 |
| 0.364730000 | 0.364730000 | 0.669910014 |
| 0.635270000 | 0.000000000 | 0.669910014 |
| 0.000000000 | 0.635270000 | 0.669910014 |

Sc2P2Se6 PE phase (space group: P-31m)

1.0

|               |              |               |
|---------------|--------------|---------------|
| 6.6838002205  | 0.0000000000 | 0.0000000000  |
| -3.3419001102 | 5.7883407848 | 0.0000000000  |
| 0.0000000000  | 0.0000000000 | 23.2525997162 |

|    |   |    |
|----|---|----|
| Sc | P | Se |
| 2  | 2 | 6  |

Direct

|             |             |             |
|-------------|-------------|-------------|
| 0.333333343 | 0.666666687 | 0.600179970 |
| 0.666666687 | 0.333333343 | 0.600179970 |
| 0.000000000 | 0.000000000 | 0.550700009 |
| 0.000000000 | 0.000000000 | 0.649659991 |
| 0.661840022 | 0.661840022 | 0.530189991 |
| 0.338159978 | 0.000000000 | 0.530189991 |
| 0.000000000 | 0.338159978 | 0.530189991 |
| 0.338129997 | 0.338129997 | 0.670080006 |
| 0.661870003 | 0.000000000 | 0.670080006 |
| 0.000000000 | 0.661870003 | 0.670080006 |

Sc2P2Se6 AFE phase (space group: P1)

1.0

|              |               |               |
|--------------|---------------|---------------|
| 6.4703001976 | 0.0000000000  | 0.0000000000  |
| 0.0000000000 | 11.8629999161 | 0.0000000000  |
| 0.0000000000 | 0.0000000000  | 23.7810001373 |

|    |   |    |
|----|---|----|
| Sc | P | Se |
| 4  | 4 | 12 |

Direct

|             |             |             |
|-------------|-------------|-------------|
| 0.014440000 | 0.999239981 | 0.499359995 |
| 0.014410000 | 0.334100008 | 0.499300003 |
| 0.485590011 | 0.499220014 | 0.518260002 |
| 0.485619992 | 0.834110022 | 0.518289983 |
| 0.506160021 | 0.166600004 | 0.436430007 |
| 0.507070005 | 0.166679993 | 0.532840014 |
| 0.992770016 | 0.666689992 | 0.484770000 |
| 0.993879974 | 0.666649997 | 0.581149995 |
| 0.351509988 | 0.971580029 | 0.436520010 |
| 0.869130015 | 0.166600004 | 0.429309994 |
| 0.351440012 | 0.361779988 | 0.436500013 |
| 0.676339984 | 0.314740002 | 0.571190000 |
| 0.186210006 | 0.166710004 | 0.567799985 |
| 0.148530006 | 0.471599996 | 0.581040025 |
| 0.823520005 | 0.518660009 | 0.446390003 |
| 0.313730001 | 0.666700006 | 0.449880004 |
| 0.823549986 | 0.814740002 | 0.446410000 |
| 0.148629993 | 0.861790001 | 0.581070006 |
| 0.631049991 | 0.666639984 | 0.588299990 |
| 0.676329970 | 0.018610001 | 0.571210027 |



ScCrP2Se6 FE phase (space group: P3)

1.0

|               |              |               |
|---------------|--------------|---------------|
| 6.5349001884  | 0.0000000000 | 0.0000000000  |
| -3.2674500942 | 5.6593895744 | 0.0000000000  |
| 0.0000000000  | 0.0000000000 | 23.1893005371 |

|    |    |   |    |
|----|----|---|----|
| Sc | Cr | P | Se |
| 1  | 1  | 2 | 6  |

Direct

|             |             |             |
|-------------|-------------|-------------|
| 0.000000000 | 0.000000000 | 0.581849992 |
| 0.333333343 | 0.666666687 | 0.580139995 |
| 0.666666687 | 0.333333343 | 0.550549984 |
| 0.666666687 | 0.333333343 | 0.648939967 |
| 0.357250005 | 0.006640000 | 0.512290001 |
| 0.993359983 | 0.350610018 | 0.512290001 |
| 0.649389982 | 0.642750025 | 0.512290001 |
| 0.048310000 | 0.697780013 | 0.649809957 |
| 0.302219987 | 0.350529999 | 0.649809957 |
| 0.649470031 | 0.951690018 | 0.649809957 |

ScCrP2Se6 PE phase (space group: P312)

1.0

|               |              |               |
|---------------|--------------|---------------|
| 6.5349001884  | 0.0000000000 | 0.0000000000  |
| -3.2674500942 | 5.6593895744 | 0.0000000000  |
| 0.0000000000  | 0.0000000000 | 23.1891002654 |

|    |    |   |    |
|----|----|---|----|
| Sc | Cr | P | Se |
| 1  | 1  | 2 | 6  |

Direct

|             |             |             |
|-------------|-------------|-------------|
| 0.000000000 | 0.000000000 | 0.580894976 |
| 0.333333343 | 0.666666687 | 0.580900013 |
| 0.666666687 | 0.333333343 | 0.531684994 |
| 0.666666687 | 0.333333343 | 0.630079984 |
| 0.329730004 | 0.979140005 | 0.512140006 |
| 0.020859986 | 0.350590005 | 0.512140006 |
| 0.649410009 | 0.670270026 | 0.512140006 |
| 0.020834991 | 0.670240014 | 0.649654984 |
| 0.329759985 | 0.350594982 | 0.649654984 |
| 0.649405032 | 0.979165017 | 0.649654984 |

ScCrP2Se6 AFE phase (space group: P1)

1.0

|              |               |               |
|--------------|---------------|---------------|
| 6.3017001152 | 0.0000000000  | 0.0000000000  |
| 0.0000000000 | 11.6492996216 | 0.0000000000  |
| 0.0000000000 | 0.0000000000  | 23.7647991180 |

|    |    |   |    |
|----|----|---|----|
| Sc | Cr | P | Se |
| 2  | 2  | 4 | 12 |

Direct

|             |             |             |
|-------------|-------------|-------------|
| 0.989820004 | 0.000980000 | 0.533680022 |
| 0.510200024 | 0.500919998 | 0.502449989 |
| 0.982900023 | 0.334120005 | 0.521950006 |
| 0.517159998 | 0.834129989 | 0.514249980 |
| 0.493640006 | 0.165079996 | 0.496300012 |
| 0.496060014 | 0.176609993 | 0.591449976 |
| 0.003980000 | 0.676720023 | 0.444689989 |
| 0.006260000 | 0.665199995 | 0.539849997 |
| 0.335640013 | 0.007680000 | 0.460590005 |
| 0.824580014 | 0.170049995 | 0.462139994 |
| 0.308499992 | 0.310020000 | 0.455240011 |
| 0.660080016 | 0.366939992 | 0.585820019 |
| 0.126139998 | 0.188869998 | 0.597299993 |
| 0.164399996 | 0.507799983 | 0.575550020 |
| 0.859960020 | 0.467130005 | 0.443610013 |
| 0.373879999 | 0.688929975 | 0.438879997 |
| 0.839959979 | 0.867009997 | 0.450309992 |
| 0.191400006 | 0.810119987 | 0.580919981 |
| 0.675320029 | 0.669990003 | 0.574020028 |
| 0.640240014 | 0.967079997 | 0.592589974 |
